# Supplementary material
Source: PubMed Central journal article supplement (PMC9923622)
Supplement: PEDS_20172439SupplementaryData.pdf [file PEDS_20172439SupplementaryData.pdf]

## Supplemental Information

**SUPPLEMENTAL TABLE 3** Procedures by CPT Code

| Procedure                                      | CPT Code                                                                           |
|------------------------------------------------|------------------------------------------------------------------------------------|
| Tonsillectomy and/or adenoidectomy             | 42825, 42826, 42830, 42831, 42835, 42836, 42820, 42821                             |
| Inguinal hernia (open or laparoscopic)         | 49491, 49492, 49495, 49496, 49500, 49501, 49505, 49507, 49520, 49521, 49525, 49650 |
| Umbilical or epigastric hernia                 | 49580, 49582, 49585, 49587, 49570, 49572                                           |
| Appendectomy                                   | 44950, 44960, 44970                                                                |
| Cholecystectomy                                | 47562, 47563, 47564, 47600, 47605, 47610                                           |
| Pectus repair (open or minimally invasive)     | 21740, 21742, 21743                                                                |
| Colectomy (open or laparoscopic)               | 44150, 44155, 44158, 44210, 44211                                                  |
| Supracondylar fracture fixation                | 24545, 24546                                                                       |
| Epicondylar fracture fixation                  | 24575                                                                              |
| Posterior arthrodesis                          | 22800, 22802, 22804                                                                |
| Arthroscopic knee repair (ACL and/or meniscus) | 29888, 29882, 29883                                                                |
| Orchiopexy (open or laparoscopic)              | 54640, 54692, 54650, 54560                                                         |
| Hypospadias repair                             | 54332, 54328, 54326, 54324, 54322                                                  |

**SUPPLEMENTAL TABLE 4** Chronic Pain Diagnoses by ICD-9 Code

| Pain Type               | ICD-9 Code                                                                                                                                                                                                                                        |
|-------------------------|---------------------------------------------------------------------------------------------------------------------------------------------------------------------------------------------------------------------------------------------------|
| Headache                | 307.81, 346 <sup>a</sup>                                                                                                                                                                                                                          |
| Abdomen                 | 564.1                                                                                                                                                                                                                                             |
| Back                    | 721.3, 721.4, 721.41, 721.42, 721.5, 721.6, 721.7, 721.8, 721.9, 721.90, 721.91, 722.2, 722.30, 722.32, 722.33, 722.80, 722.82, 722.83, 722.90, 722.92, 722.93, 737.1 <sup>a</sup> , 737.3 <sup>a</sup> , 756.10, 756.11, 756.12, 756.13, 756.19, |
| Musculoskeletal or limb | 337.2 <sup>a</sup> , 354.4, 355.71, 355.9, 733.4 <sup>a</sup>                                                                                                                                                                                     |
| Other or generalized    | 300.11, 443.82, 714.3 <sup>a</sup> , 607.89, 353.6, 625.7 <sup>a</sup> , 338.0, 338.2 <sup>a</sup> , 338.3, 338.4                                                                                                                                 |

Chronic pain secondary to chronic medical disease in Feudtner's CCCCs includes the following: inflammatory bowel disease, sickle cell disease, malignancy, Caffey disease, cerebral palsy and/or spasticity, spinal cord and neural malformations, muscular dystrophy, and progressive neurodegenerative and/or metabolic conditions, including mitochondriopathies.

<sup>a</sup> Indicates inclusion of all ICD-9 codes contained within this category or sub-category.
